# Supplementary material for: HS-SPME Combined with GC-MS/O to Analyze the Flavor of Strong Aroma Baijiu Daqu
Source: MDPI journal article supplement (doi:10.3390/foods11010116), 2022-01-03
Supplement: s1 [file s1]

**Table S1 Samples code and status.**

| Sample name | Different states of <i>Daqu</i>                  |
|-------------|--------------------------------------------------|
| S-0D        | <i>Daqu</i> blank-pressed (0 Day)                |
| S-4D        | <i>Daqu</i> after early fermentation (4 Day)     |
| S-6D        | <i>Daqu</i> with low temperature culture (6 Day) |
| S-10D       | <i>Daqu</i> with slow rising stage (10 Day)      |
| S-22D       | <i>Daqu</i> with mature stage (22 Day)           |
| S-3M        | <i>Daqu</i> after storage (3 Month)              |

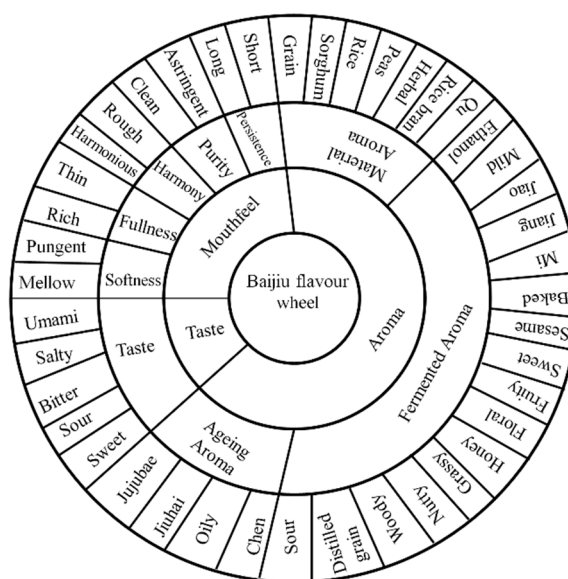

**Figure S1 Baijiu flavour wheel**

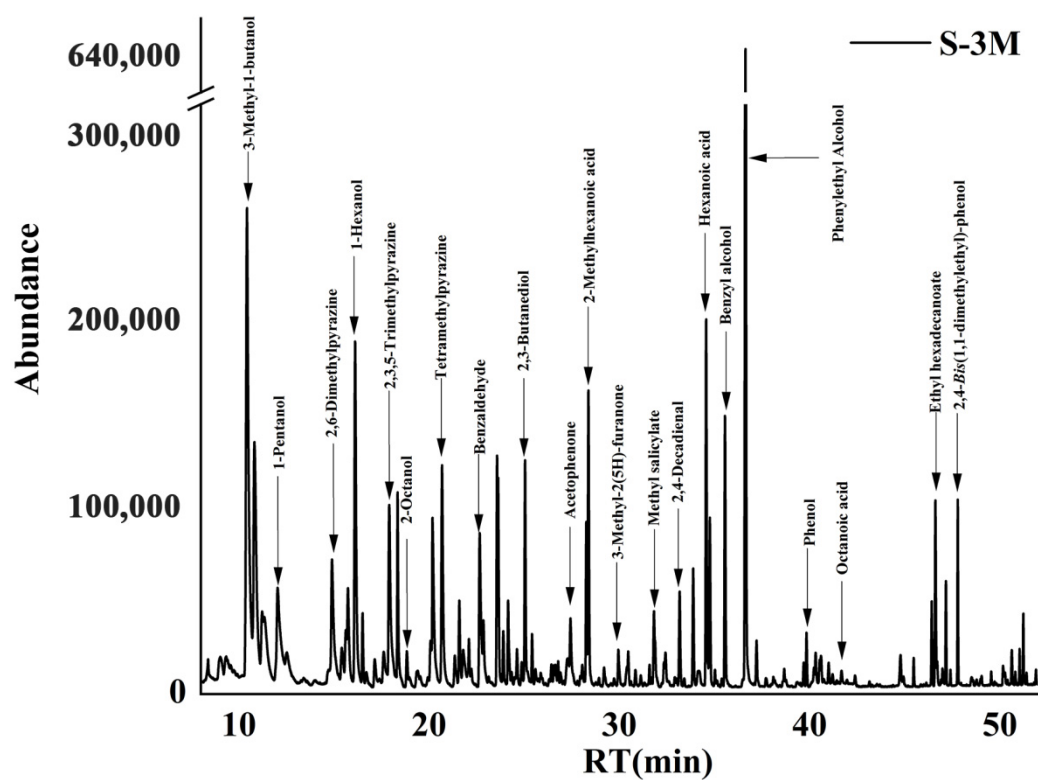

Figure S2 TIC diagram of Daqu after storage (S-3M)
